# Supplementary material for: Bubbling resilient 3D free-standing nanoporous graphene with an encapsulated multicomponent nano-alloy for enhanced electrocatalysis
Source: Royal Society of Chemistry journal article supplement (doi:10.1039/d4nh00190g), 2024-01-01
Supplement: d4nh00190g1.pdf [file d4nh00190g1.pdf]

**Bubbling resilient 3D free-standing nanoporous graphene with  
encapsulated multicomponent nano-alloy for enhanced  
electrocatalysis**

Linshan Zhu<sup>▽</sup>, Qingqing Li<sup>▽</sup>, Yixuan Hu<sup>▽</sup>, Xin Wu, Kolan Madhav Reddy,\* Kaikai Li,\* Guoqiang Xie, Xingjun Liu, and Hua-Jun Qiu\*

Linshan Zhu, Qingqing Li, Xin Wu, Kaikai Li, Guoqiang Xie, Xingjun Liu, Hua-Jun Qiu  
School of Materials Science and Engineering, Harbin Institute of Technology (Shenzhen),  
Shenzhen, China

E-mail: [qiuhua jun@hit.edu.cn](mailto:qiuhua jun@hit.edu.cn); [likaikai@hit.edu.cn](mailto:likaikai@hit.edu.cn)

Yixuan Hu, Kolan Madhav Reddy

Frontier Research Center for Materials Structure, School of Materials Science and Engineering,  
Shanghai Jiao Tong University, Shanghai 200240, China

Email: [kmreddy@sjtu.edu.cn](mailto:kmreddy@sjtu.edu.cn)

Qingqing Li,

Zhejiang Laboratory, Hangzhou 311100, China

Hua-Jun Qiu

Shenzhen Key Laboratory of Advanced Functional Carbon Materials Research and Comprehensive  
Application, Harbin Institute of Technology, Shenzhen, 518055 China

## **Experimental**

### ***Preparation of nanoporous substrates***

Mn<sub>70</sub>Ni<sub>10</sub>Cu<sub>10</sub>Co<sub>4.5</sub>Pt<sub>0.5</sub> (at.%) was prepared by melting pure melts (>99.9 wt.%) using an induction melting furnace under the protection of Ar, and then the alloy flake is prepared by cold-rolling to a thickness of ~30 μm at room temperature. The multicomponent nanoporous alloy templates with pore sizes of ~3-5 nm was prepared by chemically dealloying Mn<sub>70</sub>Ni<sub>10</sub>Cu<sub>10</sub>Co<sub>4.5</sub>Pt<sub>0.5</sub> (at.%) in a 1.0 M (NH<sub>4</sub>)<sub>2</sub>SO<sub>4</sub> aqueous solution at 50 °C for 12 h. The templates were then washed thoroughly with deionized water and dried in vacuum.

### ***Preparation of nanoporous N-doped graphene/ Pt-based multicomponent alloy***

Firstly, the multicomponent nanoporous alloy templates loaded on a corundum plate were inserted into the center of a quartz tube (φ30×φ27×1000 mm) furnace, and subsequently annealed at 800 °C under a mixed atmosphere of Ar (99.99%, 200 sccm) and H<sub>2</sub> (99.99%, 100 sccm) for 3 min as the reduction pre-treatment. Secondly, the N-doped graphene was grown on nanoporous multicomponent alloy ligament surface by introducing pyridine (0.2 mbar, 99.8%, anhydrous, Sigma-Aldrich) vapor with the gas flow of Ar (200 sccm) and H<sub>2</sub> (100 sccm) at 800 °C for 2 min. After that, the furnace was immediately opened, and the inner quartz tube was cooled with a fan to room temperature. The nanoporous N-doped graphene network with encapsulated nanoporous Pt-based multicomponent alloy (NG/PtMnNiCuCo) was finally obtained by etching the CVD-treated sample in 8.0 M HNO<sub>3</sub> for 30 minutes at room temperature

and followed with pure distilled water rinsing for at least three times. In comparison, pure nanoporous N-doped graphene was prepared by using nanoporous Ni as template which was obtained by chemically dealloying Ni<sub>30</sub>Mn<sub>70</sub> (at.%) in a 1.0 M (NH<sub>4</sub>)<sub>2</sub>SO<sub>4</sub> aqueous solution at 50 °C. Other fabrication conditions are the same as that of NG/PtMnNiCuCo.

### ***Preparation of virtual seawater***

The neutral seawater used for the test was artificially simulated by dissolving 2.686 g NaCl (AR, 99.5%), 0.494 g MgCl<sub>2</sub> • 8H<sub>2</sub>O (AR, 98%), 0.705 g MgSO<sub>4</sub> • 7H<sub>2</sub>O (AR, 99%), 0.228 g CaCl<sub>2</sub> • 6H<sub>2</sub>O (AR, 97%), 0.019 g NaHCO<sub>3</sub> (AR, 99.8%), and 0.072 g KCl (AR, 99.5%) in 100 mL of deionized water, and the pH value was detected by the pH detector.

### ***Material characterization***

Sample characterization was performed on a JEM-ARM 200F aberration corrected transmission electron microscope (TEM) equipped with energy dispersive X-ray spectrometer (EDS), a HITACHI S-4700 scanning electron microscope (SEM) equipped with EDS, an X-ray diffraction (XRD) diffractometer using Cu K $\alpha$  radiation (Panalytical aries), and an X-ray photoelectron spectroscopy (XPS, ESCALAB 250). Raman spectra were tested by a Raman microscope (Renishaw in Via-Qontor Raman Microscope) with an incident wavelength of 532 nm.

### ***Electrochemical measurements***

All electrochemical measurements were performed on a CHI660E electrochemical workstation with a three-electrode system. The three-electrode system includes a glassy

carbon electrode adhered with a piece of free-standing NG/PtMnNiCuCo with the help of Nafion (2  $\mu\text{L}$ , 0.5 wt %, Aladdin) as working electrode, a carbon rod as the counter electrode, and an Ag/AgCl (filled with saturated KCl solution) as the reference electrode. The following electrochemical tests were performed with a Pt loading of 12  $\mu\text{g Pt cm}^{-2}$ . The scanning rate used in linear scanning voltammetry (LSV) and cyclic voltammetry (CV) is 5  $\text{mV s}^{-1}$ . For hydrogen evolution reaction (HER), the solution was 0.5 M  $\text{H}_2\text{SO}_4$  solution saturated with  $\text{H}_2$  (by bubbling pure  $\text{H}_2$  for 30 min). For oxygen reduction reaction (ORR), the solution was 0.1 M  $\text{HClO}_4$  solution saturated with  $\text{O}_2$  (by bubbling pure  $\text{O}_2$  for 30 min). The current density was normalized to the geometrical area, electrochemical surface area or the mass of noble Pt. The measured potentials vs Ag/AgCl were converted to a reversible hydrogen electrode (RHE) scale according to the Nernst equation ( $E_{\text{RHE}} = E_{\text{Ag/AgCl}} + 0.0592 \text{ pH} + 0.197$ ).

The electron transfer number ( $n$ ) during ORR was estimated by measuring the diffusion-limiting current density ( $j_L$ ) at different rotating speed ( $\omega$ ) of the working electrode according to Koutecky-Levich equations (1):

$$\frac{1}{j} = \frac{1}{j_L} + \frac{1}{j_K} = \frac{1}{B\omega^2} + \frac{1}{j_K} = \frac{1}{(0.2nFC_0D_0^{2/3}\nu^{-1/6})\omega^{1/2}} + \frac{1}{j_K} \quad (1)$$

where  $F$  is the Faraday constant (96485  $\text{C mol}^{-1}$ );  $C_0$  and  $D_0$  are the bulk concentration ( $1.2 \times 10^{-6} \text{ mol cm}^{-3}$ ) and diffusion coefficient ( $1.9 \times 10^{-5} \text{ cm}^2 \text{ s}^{-1}$ ) of  $\text{O}_2$  in 0.1 M  $\text{HClO}_4$ , respectively;  $\nu$  is the kinematic viscosity of the electrolyte ( $0.01 \text{ cm}^2 \text{ s}^{-1}$ ).

### ***DFT calculations***

The DFT calculations were performed using the Vienna ab initio Simulation Package

(VASP). Perdew, Burke, and Ernzerhof (PBE) functional of generalized gradient approximation (GGA) with projector augmented wave (PAW) was applied to describe the electronic structures of materials. The plane-wave-basis kinetic energy cutoff was set to 400 eV. The Brillouin zones are sampled using Gamma-centered k-mesh of  $3 \times 3 \times 1$ . The vacuum layers are set to  $\sim 15 \text{ \AA}$  to decouple the interaction between periodic images. The rest atomic layers and adsorbates are free to relax until the net force per atom is less than  $0.05 \text{ eV/\AA}$ .

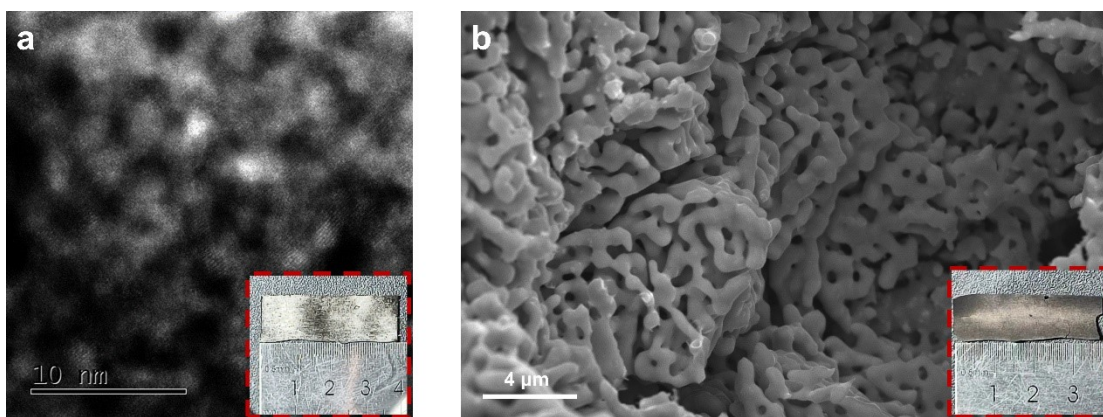

Figure S1. (a) HAADF-STEM image and photograph (inset in a) of the nanoporous MnNiCuCoPt template obtained by dealloying. (b) SEM image and photograph (inset in b) of nanoporous template after CVD growth of graphene.

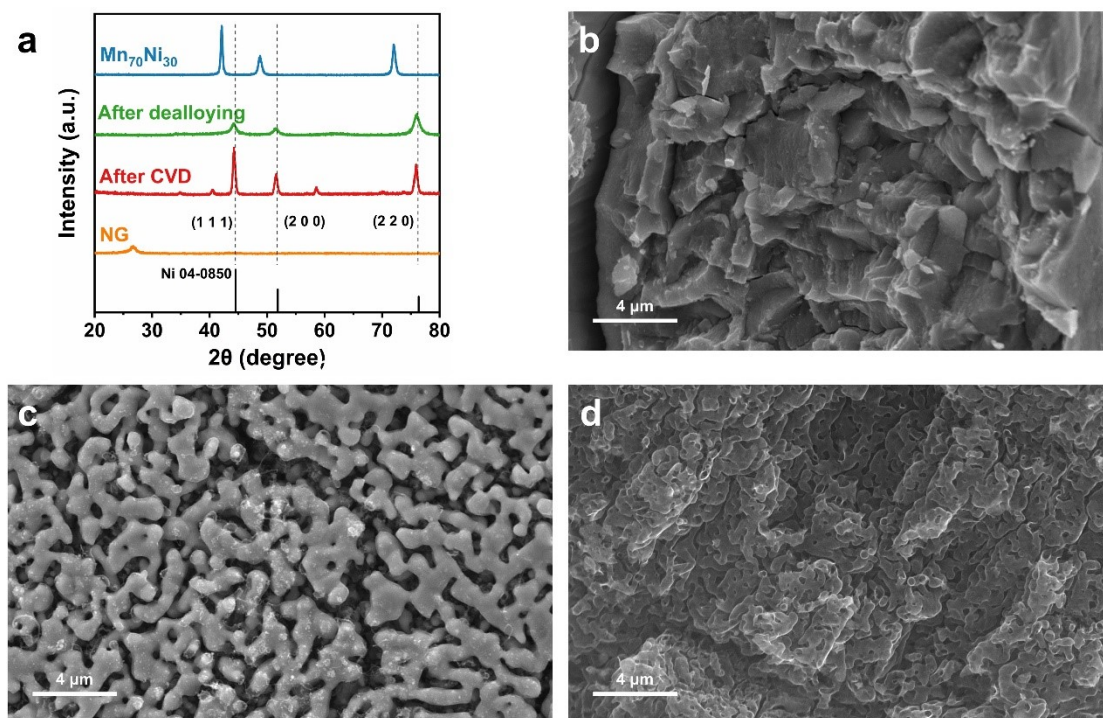

Figure S2. (a) XRD patterns of the precursor NiMn alloy, dealloyed nanoporous Ni, after CVD growth of graphene and after the removal of the templates by HNO<sub>3</sub> (i.e., NG). SEM images of the (b) obtained nanoporous Ni, (c) the coarsened nanoporous Ni after CVD growth of graphene and (d) the nanoporous N-doped graphene (NG) after the removal of porous Ni template.

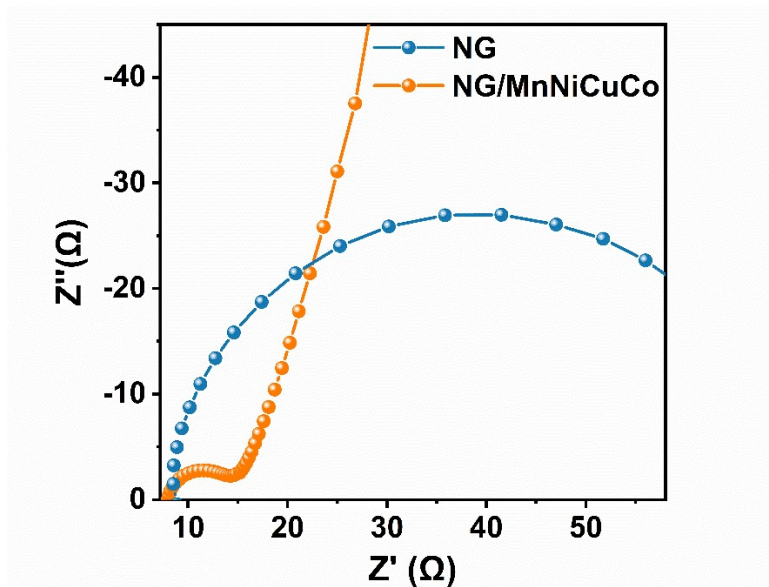

Figure S3. Electrochemical impedance spectroscopy (EIS) collected in the frequency range of 0.01–10<sup>5</sup> Hz.

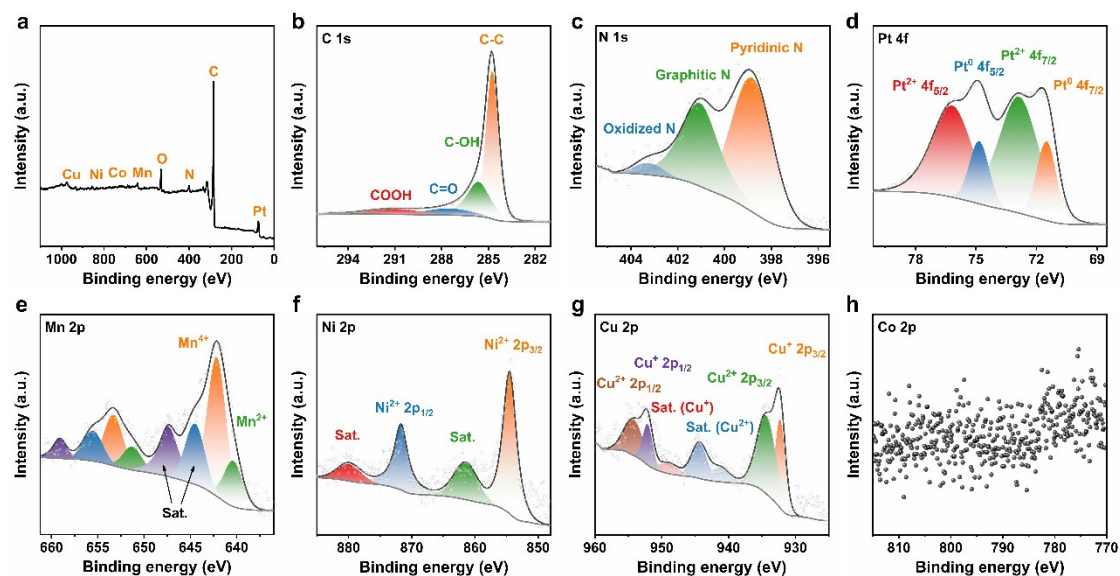

Figure S4. XPS spectra of nanoporous composite: (a) full XPS survey, (b) C 1s, (c) N 1s, (d) Pt 4f, (e) Mn 2p, (f) Ni 2p, (g) Cu 2p, (h) Co 2p.

In Figure S4, Ni are mainly in the states of Ni<sup>2+</sup>. High resolution XPS region scan of Mn 2p reveals the existence of both Mn<sup>2+</sup> and Mn<sup>4+</sup> (*Angew. Chem. Int. Ed.*, 2023, 62, 202302329). The Cu 2p spectrum suggests the presence of both Cu<sup>+</sup> and Cu<sup>2+</sup> on the nanoporous alloy surface. Cobalt has

been etched to a very low level on the surface. Considering the detected Co by STEM-EDS, it is reasonable to believe that most residual Co are inside of the nanoalloy. The Pt 4f spectrum shows that Pt are in the form of both Pt<sup>0</sup> and Pt<sup>2+</sup> (Figure S4). Compared with that of nanoporous PtCu alloy dealloyed in the same 8 M HNO<sub>3</sub> solution (*ACS Catal.* **2015**, *5* (6), 3779–3785), the ratio of Pt<sup>2+</sup> in the dealloyed multicomponent Pt alloy is much higher (Pt<sup>2+</sup>/Pt<sup>0</sup>≈3), which may be due to the presence of many single atoms (as shown in Figure 2f). Because the zero-valent metal single atoms are extremely unstable, it needs to form a chemical bond with oxygen or nitrogen to keep stable. The presence of single atom-based noble metals can be helpful for many catalytic reactions (*J. Am. Chem. Soc.* **2022**, *144* (40), 18155–18174).

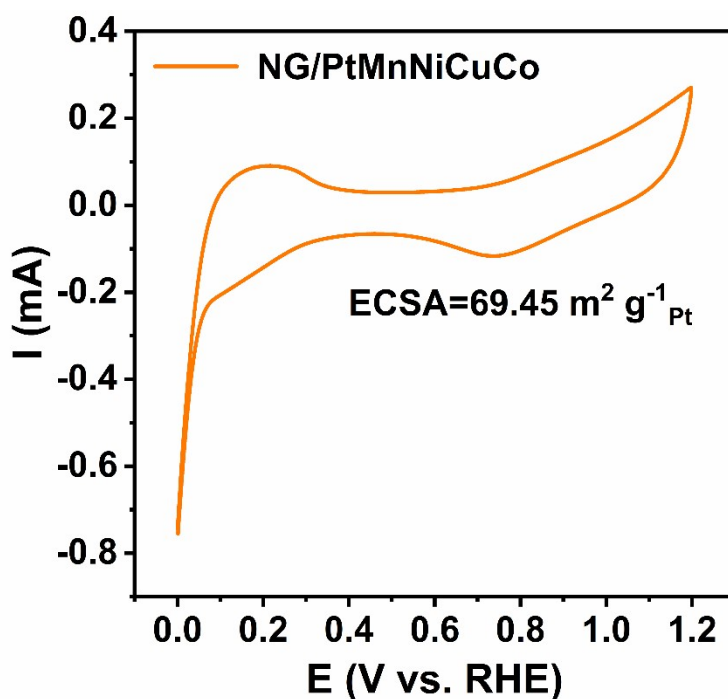

Figure S5. CV curves of the 3D graphene/nanoporous alloy composite recorded in N<sub>2</sub> saturated 0.1 M HClO<sub>4</sub> solution at a sweep rate of 50 mV s<sup>-1</sup>.



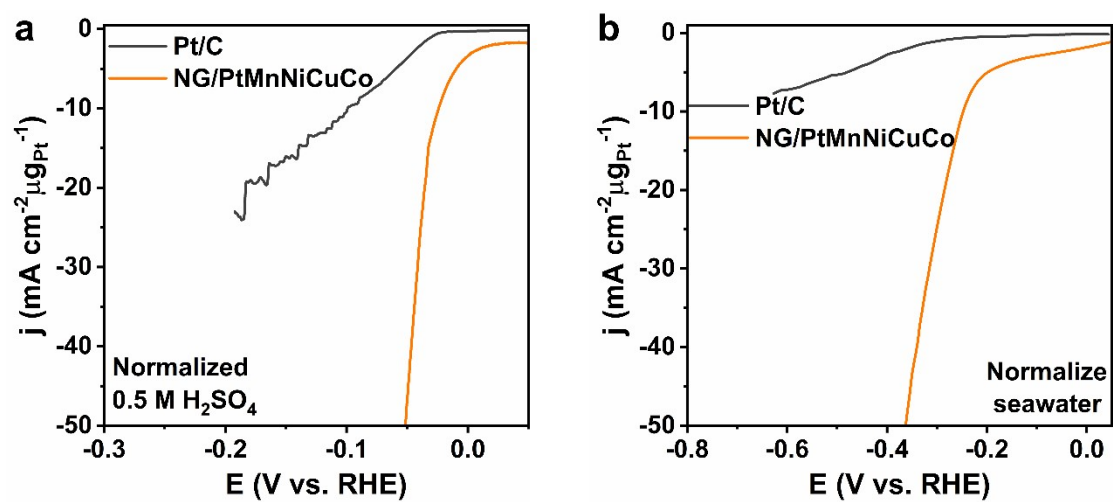

Figure S6. (a) LSV curves in the 0.5 M  $\text{H}_2\text{SO}_4$  normalized by loaded Pt on electrodes. (b) LSV curves in the seawater normalized by Pt loading amounts on electrodes.

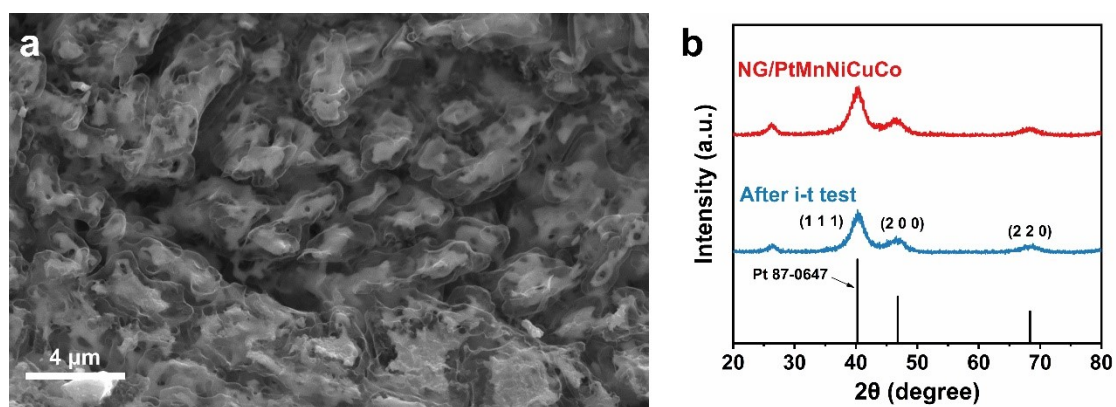

Figure S7. (a) SEM image of the NG/PtMnNiCuCo after i-t test in 0.5 M  $\text{H}_2\text{SO}_4$ . (b) XRD of the NG/PtMnNiCuCo before and after i-t test in 0.5 M  $\text{H}_2\text{SO}_4$ .

Table S1. The atomic percentages of Mn, Ni, Cu, Co, and Pt in different stages of the sample were measured from SEM-EDS.

| Sample           | Content (at.%) |       |       |       |       |
|------------------|----------------|-------|-------|-------|-------|
|                  | Mn             | Ni    | Cu    | Co    | Pt    |
| precursor        | 74.64          | 10.45 | 10.13 | 4.31  | 0.47  |
| After dealloying | 11.96          | 34.81 | 35.32 | 16.95 | 0.96  |
| After CVD        | 11.04          | 35.21 | 35.52 | 17.25 | 0.98  |
| NG/PtMnNiCuCo    | 8.37           | 13.15 | 14.28 | 12.83 | 51.37 |
| After i-t test   | 7.81           | 14.13 | 13.98 | 11.91 | 52.71 |

Table S2. Content of metal elements in NG/PtMnNiCuCo from STEM-EDS.

| Element | Content (at.%) |
|---------|----------------|
| Pt      | 57             |
| Mn      | 9              |
| Ni      | 17             |
| Co      | 17             |

Due to the interference of Cu grid, the Cu content is ignored.

Table S3. Comparison of the ORR activity of NG/PtMnNiCuCo with various recently reported Pt-based catalysts in acidic media.

| Catalysts                                 | Half-wave potential<br>(V vs. RHE) | Tafel slope<br>(mV dec <sup>-1</sup> ) | Pt loading<br>(ugPt cm <sup>-2</sup> ) | Ref.      |
|-------------------------------------------|------------------------------------|----------------------------------------|----------------------------------------|-----------|
| NG/PtMnNiCuCo                             | 0.90                               | 60.4                                   | 12                                     | This work |
| PtA@Fe <sub>SA</sub> -N-C                 | 0.923                              | 64                                     | 13                                     | 1         |
| PtCu NSs/C                                | 0.893                              | 79.2                                   | 18.9                                   | 2         |
| PtCo <sub>3</sub> -H600                   | 0.905                              | ----                                   | 12                                     | 3         |
| Pt <sub>1</sub> Co <sub>100</sub> /N-GCNT | 0.85                               | 82                                     | ----                                   | 4         |
| Pd@PtCu                                   | 0.89                               | ----                                   | 15                                     | 5         |
| 4% Ga-Pt <sub>3</sub> Co                  | 0.894                              | ----                                   | 36.7                                   | 6         |
| PtNi <sub>3</sub> @OMC-A                  | 0.907                              | ----                                   | 15.3                                   | 7         |
| PtBi/C                                    | 0.886                              | ----                                   | 10                                     | 8         |
| Pt/CNTs                                   | 0.85                               | ----                                   | 20                                     | 9         |
| Pt-Ni@Pt <sub>D</sub> /G                  | 0.83                               | 70                                     | 20                                     | 10        |
| Pt@Mn-SAs/N-C                             | 0.896                              | ----                                   | 7.92                                   | 11        |
| Pt-SnS <sub>2</sub> /SnO <sub>2</sub> -90 | 0.895                              | ----                                   | 18.7                                   | 12        |
| Pt/NHPC-800                               | 0.878                              | ----                                   | 18.65                                  | 13        |
| Pt-C-N                                    | 0.84                               | 71.4                                   | 0.54                                   | 14        |
| Pt-PANI                                   | 0.878                              | ----                                   | 28                                     | 15        |
| PtRhNiFeCu/C                              | 0.9                                | ----                                   | 10.2                                   | 16        |
| PtCuGaFeCo NPs                            | 0.88                               | 55                                     | ----                                   | 17        |
| Pt <sub>4</sub> FeCoCuNi/C                | 0.943                              | 51.5                                   | 8.57                                   | 18        |
| Pt/TiC@TiO <sub>2</sub> -C                | 0.84                               | 77                                     | ----                                   | 19        |
| PFCNC-HEA                                 | 0.88                               | 68                                     | ----                                   | 20        |

Table S4. Comparison of the HER activity of NG/PtMnNiCuCo with various recently reported Pt-based catalysts in acidic media.

| Catalysts                                                                            | Overpotential<br>@10mA cm <sup>-2</sup> (mV) | Tafel slope<br>(mV dec <sup>-1</sup> ) | Pt loading<br>(ugPt cm <sup>-2</sup> ) | Ref.      |
|--------------------------------------------------------------------------------------|----------------------------------------------|----------------------------------------|----------------------------------------|-----------|
| NG/PtMnNiCuCo                                                                        | 23                                           | 26.4                                   | 12                                     | This work |
| Pt <sub>2</sub> Sr/NC                                                                | 27                                           | 26                                     | 18.64                                  | 21        |
| Pt-W <sub>18</sub> O <sub>49</sub>                                                   | 23                                           | 30                                     | 20.5                                   | 22        |
| Pt@Co SAs-ZIF-NC                                                                     | 27                                           | 21                                     | 14                                     | 23        |
| Pt Cs/MoO <sub>2</sub> NSs-L                                                         | 47                                           | 36                                     | ----                                   | 24        |
| Pt <sub>2</sub> Co <sub>8</sub> @N-C                                                 | 47                                           | 48                                     | 200                                    | 25        |
| PtRh DNAs                                                                            | 27                                           | 40                                     | ----                                   | 26        |
| Pt <sub>3</sub> Fe/BNC                                                               | 38                                           | 31.3                                   | ----                                   | 27        |
| Pt-V <sub>2</sub> CT <sub>x</sub>                                                    | 27                                           | 36.5                                   | 14                                     | 28        |
| Pt/Mxene                                                                             | 34                                           | 29.7                                   | ----                                   | 29        |
| Pt/CoO <sub>x</sub> -HCS-3000                                                        | 28                                           | 31                                     | ----                                   | 30        |
| Pt <sub>3</sub> Fe/NMCS-A                                                            | 13                                           | 21                                     | 408                                    | 31        |
| 5% 1T-PtO <sub>2</sub> /C                                                            | 12                                           | 18.6                                   | 4.7                                    | 32        |
| m-Pt@MoS <sub>2</sub>                                                                | 47                                           | 32                                     | 12.9                                   | 33        |
| Pt <sub>0.04</sub> /Ni-DA                                                            | 18                                           | 34.32                                  | 17.7                                   | 34        |
| Pt@PtIr NDs                                                                          | 22                                           | 14.6                                   | 15.48                                  | 35        |
| Au <sub>81</sub> Pd <sub>2</sub> Pt <sub>9</sub> -S <sup>B4.6A3.4</sup> <sub>8</sub> | 35                                           | 14.4                                   | ----                                   | 36        |
| 2.5 mM Pt-HEC                                                                        | 70                                           | 47                                     | ----                                   | 37        |
| Pt-Er/h-NC                                                                           | 25                                           | 17.1                                   | 7.07                                   | 38        |
| 5%Pt-Ru ONAs/C                                                                       | 31                                           | 32.4                                   | ----                                   | 39        |
| Pt/CoO <sub>x</sub> -HCS-3000                                                        | 28                                           | 31                                     | ----                                   | 40        |

## Reference

- 1 X. Ao, W. Zhang, B. Zhao, Y. Ding, G. Nam, L. Soule, A. Abdelhafiz, C. Wang and M. Liu, *Energy Environ. Sci.*, 2020, **13**, 3032–3040.
- 2 W. Li, Z.-Y. Hu, Z. Zhang, P. Wei, J. Zhang, Z. Pu, J. Zhu, D. He, S. Mu and G. Van Tendeloo, *J. Catal.*, 2019, **375**, 164–170.
- 3 Z. Wang, X. Yao, Y. Kang, L. Miao, D. Xia and L. Gan, *Adv. Funct. Mater.*, 2019, **29**, 1902987.
- 4 X. Cheng, Y. Wang, Y. Lu, L. Zheng, S. Sun, H. Li, G. Chen and J. Zhang, *Appl. Catal. B*, 2022, **306**, 121112.
- 5 M. Bao, I. S. Amiin, T. Peng, W. Li, S. Liu, Z. Wang, Z. Pu, D. He, Y. Xiong and S. Mu, *ACS Energy Lett.*, 2018, **3**, 940–945.
- 6 M. Li, Z. Zhao, Z. Xia, Y. Yang, M. Luo, Y. Huang, Y. Sun, Y. Chao, W. Yang, W. Yang, Y. Yu, G. Lu and S. Guo, *ACS Catal.*, 2020, **10**, 3018–3026.
- 7 K. Wang, Y. Wang, S. Geng, Y. Wang and S. Song, *Adv. Funct. Mater.*, 2022, **32**, 2113399.
- 8 Y. Qin, M. Luo, Y. Sun, C. Li, B. Huang, Y. Yang, Y. Li, L. Wang and S. Guo, *ACS Catal.*, 2018, **8**, 5581–5590.
- 9 X. Tong, J. Zhang, G. Zhang, Q. Wei, R. Chenitz, J. P. Claverie and S. Sun, *Chem. Mater.*, 2017, **29**, 9579–9587.
- 10 X. Lyu, Y. Jia, X. Mao, D. Li, G. Li, L. Zhuang, X. Wang, D. Yang, Q. Wang, A. Du and X. Yao, *Adv. Mater.*, 2020, **32**, 2003493.
- 11 L. Gong, J. Zhu, F. Xia, Y. Zhang, W. Shi, L. Chen, J. Yu, J. Wu and S. Mu, *ACS Catal.*, 2023, **13**, 4012–4020.
- 12 Z. Lin, J. Liu, S. Li, J. Liang, X. Liu, L. Xie, G. Lu, J. Han, Y. Huang and Q. Li, *Adv. Funct. Mater.*, 2023, **33**, 2211638.
- 13 M. Li, F. Liu, S. Pei, Z. Zhou, K. Niu, J. Wu and Y. Zhang, *Nanomaterials*, 2023, **13**, 444.
- 14 L. Zhang, T. Li, T. Du, X. Dai, L. Zhang, C. Tao, J. Ding, C. Yan and T. Qian, *Inorg. Chem.*, 2024, **63**, 2138–2147.
- 15 S. Xue, R. Yang, C. Lei, J. Zhao, S. Sun, M. Zhao, Z. Wang, Q. Huang and Y. Wu, *Chem. Eng. J.*, 2024, **485**, 149891.
- 16 Z. Hu, K. Chen, Y. Zhu, B. Liu and J. Shen, *Small*, 2024, 2309819.
- 17 H. Kuang, Z. Xu, X. Tan, K. Yu and C. Chen, *Small*, 2024, 2308421.
- 18 Y. Wang, N. Gong, H. Liu, W. Ma, K. Hippalgaonkar, Z. Liu and Y. Huang, *Adv. Mater.*, 2023, **35**, 2302067.
- 19 C. Zheng, X. Sun, Y. Qin, J. Li, G. Jin, X. Tong and N. Yang, *Adv. Sustainable Syst.*, 2024, **8**, 2300556.
- 20 T. Chen, F. Ning, J. Qi, G. Feng, Y. Wang, J. Song, T. Yang, X. Liu, L. Chen and D. Xia, *iScience*, 2023, **26**, 105890.
- 21 X. Liu, S. Hao, G. Zheng, Z. Su, Y. Wang, Q. Wang, L. Lei, Y. He and X. Zhang, *J. Energy Chem.*, 2022, **64**, 315–322.
- 22 W. X. Li, Z. Y. Liu, S. C. Yang, J. N. Wu, L. Sun, E. G. Ma, H. G. Yang and X. Guo, *Sci. China Mater.*, 2022, **65**, 3435–3441.
- 23 L. Liang, H. Jin, H. Zhou, B. Liu, C. Hu, D. Chen, Z. Wang, Z. Hu, Y. Zhao, H.-W. Li, D.

- He and S. Mu, *Nano Energy*, 2021, **88**, 106221.
- 24 X. Li, J. Yu, J. Jia, A. Wang, L. Zhao, T. Xiong, H. Liu and W. Zhou, *Nano Energy*, 2019, **62**, 127–135.
- 25 W. Ren, W. Zang, H. Zhang, J. Bian, Z. Chen, C. Guan and C. Cheng, *Carbon*, 2019, **142**, 206–216.
- 26 Z. Han, R.-L. Zhang, J.-J. Duan, A.-J. Wang, Q.-L. Zhang, H. Huang and J.-J. Feng, *Int. J. Hydrogen Energy*, 2020, **45**, 6110–6119.
- 27 Y. Qiao, J. Cui, F. Qian, X. Xue, X. Zhang, H. Zhang, W. Liu, X. Li and Q. Chen, *ACS Appl. Nano Mater.*, 2022, **5**, 318–325.
- 28 S. Park, Y.-L. Lee, Y. Yoon, S. Y. Park, S. Yim, W. Song, S. Myung, K.-S. Lee, H. Chang, S. S. Lee and K.-S. An, *Appl. Catal. B*, 2022, **304**, 120989.
- 29 Y. Wu, W. Wei, R. Yu, L. Xia, X. Hong, J. Zhu, J. Li, L. Lv, W. Chen, Y. Zhao, L. Zhou and L. Mai, *Adv. Funct. Mater.*, 2022, **32**, 2110910.
- 30 Y. Wang, B. Zhu, B. Cheng, W. Macyk, P. Kuang and J. Yu, *Appl. Catal. B*, 2022, **314**, 121503.
- 31 P. Kuang, Z. Ni, B. Zhu, Y. Lin and J. Yu, *Adv. Mater.*, 2023, **35**, 2303030.
- 32 H. Yang, Y. Ji, Q. Shao, W. Zhu, M. Fang, M. Ma, F. Liao, H. Huang, Y. Zhang, J. Yang, Z. Fan, Y. Li, Y. Liu, M. Shao and Z. Kang, *Energy Environ. Sci.*, 2023, **16**, 574–583.
- 33 J. Wang, W. Zang, X. Liu, J. Sun, S. Xi, W. Liu, Z. Kou, L. Shen and J. Wang, *Small*, 2024, 2309427.
- 34 Y. Peng, K. Ma, T. Xie, J. Du, L. Zheng, F. Zhang, X. Fan, W. Peng, J. Ji and Y. Li, *ACS Appl. Mater. Interfaces*, 2023, **15**, 27089–27098.
- 35 C. Liu, Z. Wei, M. Cao and R. Cao, *Nano Res.*, 2024, **17**, 4844–4849.
- 36 Y. Fan, X. Zhang, M. Zhang, X. Yue, W. Du and H. Xia, *Chem. Eng. J.*, 2023, **470**, 144149.
- 37 D. Kim, S. Surendran, Y. Jeong, Y. Lim, S. Im, S. Park, J. Y. Kim, S. Kim, T. Kim, B. Koo, K. Jin and U. Sim, *Adv. Mater. Technol.*, 2023, **8**, 2200882.
- 38 G. Chen, W. Chen, R. Lu, C. Ma, Z. Zhang, Z. Huang, J. Weng, Z. Wang, Y. Han and W. Huang, *J. Am. Chem. Soc.*, 2023, **145**, 22069–22078.
- 39 Q. Yao, J. Le, S. Yang, J. Cheng, Q. Shao and X. Huang, *Chinese Journal of Catalysis*, 2022, **43**, 1493–1501.
- 40 Y. Wang, B. Zhu, B. Cheng, W. Macyk, P. Kuang and J. Yu, *Applied Catalysis B: Environmental*, 2022, **314**, 121503.
